# Supplementary material for: Misconceptions about the chemistry of aqueous chlorine atoms and HClOH˙(aq), and a revised mechanism for the photochemical peroxydisulfate/chloride reaction
Source: Royal Society of Chemistry journal article supplement (doi:10.1039/d2cp00914e), 2022-01-01
Supplement: d2cp00914e1.pdf [file d2cp00914e1.pdf]

Supporting information

**Misconceptions about the Chemistry of Aqueous Chlorine Atoms and  $\text{HClOH}^{\bullet}(\text{aq})$ , and a Revised Mechanism for the Photochemical Peroxydisulfate/Chloride Reaction**

David M. Stanbury

Dept. of Chemistry and Biochemistry, Auburn University, Auburn, AL 36849, USA

to be published in *Phys. Chem. Chem. Phys.*, 2022.

**Contents:**

|                                                                                          |   |
|------------------------------------------------------------------------------------------|---|
| Modified mechanism of Alegre et al.                                                      | 2 |
| A comprehensive list of the 18 reported illegal loops involving $\text{HClOH}^{\bullet}$ | 3 |
| References                                                                               | 9 |

## Mechanism used in the simulations of the data of Alegre et al.<sup>1</sup>

|    |                                                                                                                     |                                                                                       |
|----|---------------------------------------------------------------------------------------------------------------------|---------------------------------------------------------------------------------------|
| 1  | $\text{SO}_4^{\bullet-} + \text{Cl}^- \rightarrow \text{SO}_4^{2-} + \text{Cl}^\bullet$                             | $k = 2.7\text{E}8 \text{ M}^{-1} \text{ s}^{-1}$                                      |
| 2  | $\text{Cl}^\bullet + \text{Cl}^- \rightleftharpoons \text{Cl}_2^{\bullet-}$                                         | $k_f = 8.5\text{E}9 \text{ M}^{-1} \text{ s}^{-1}, k_r = 6\text{E}4 \text{ s}^{-1}$   |
| 3  | $\text{Cl}_2^{\bullet-} + \text{Cl}_2^{\bullet-} \rightarrow \text{Cl}_2 + \text{Cl}^- + \text{Cl}^-$               | $\log k = 8.8 + 1.6\mu^{1/2}/(1 + \mu^{1/2})$                                         |
| 4  | $\text{Cl}^\bullet + \text{H}_2\text{O} \rightleftharpoons \text{ClOH}^\bullet + \text{H}^+$                        | $k_f = 1.5\text{E}5 \text{ s}^{-1}, k_r = 3\text{E}10 \text{ M}^{-1} \text{ s}^{-1}$  |
| 5  | $\text{ClOH}^\bullet \rightleftharpoons \text{HO}^\bullet + \text{Cl}^-$                                            | $k_f = 6.1\text{E}9 \text{ s}^{-1}, k_r = 4.3\text{E}9 \text{ M}^{-1} \text{ s}^{-1}$ |
| 6  | $\text{Cl}_2 + \text{H}_2\text{O} \rightarrow \text{ClOH} + \text{Cl}^- + \text{H}^+$                               | $k = 11 \text{ s}^{-1}$                                                               |
| 7  | $\text{Cl}_2 + \text{Cl}^- \rightleftharpoons \text{Cl}_3^-$                                                        | $k_f = 1\text{E}10 \text{ M}^{-1} \text{ s}^{-1}, k_r = 5.6\text{E}10 \text{ s}^{-1}$ |
| 8  | $\text{SO}_4^{\bullet-} + \text{S}_2\text{O}_8^{2-} \rightarrow \text{SO}_4^{2-} + \text{S}_2\text{O}_8^{\bullet-}$ | $k = 1.2\text{E}5 \text{ M}^{-1} \text{ s}^{-1}$                                      |
| 9  | $\text{SO}_4^{2-} + \text{HO}^\bullet \rightarrow \text{SO}_4^{\bullet-} + \text{HO}^-$                             | $1\text{E}6 \text{ M}^{-1} \text{ s}^{-1}$                                            |
| 10 | $\text{HO}^\bullet + \text{HO}^\bullet \rightarrow \text{H}_2\text{O}_2$                                            | $5.5\text{E}9 \text{ M}^{-1} \text{ s}^{-1}$                                          |
| 11 | $\text{H}^+ + \text{OH}^- \rightleftharpoons \text{H}_2\text{O}$                                                    | $k_f = 1\text{E}10 \text{ M}^{-1} \text{ s}^{-1}, k_r = 1\text{E}-4 \text{ M s}^{-1}$ |

Mechanism and rate constants as in Table 1 of Alegre et al. with the following exceptions.

Reaction 6 in Alegre et al. is omitted because of its insignificant contribution at the pH of the simulations (pH 3). Reaction 4 above replaces reactions 8, 9 and 10 in Alegre et al. The rate constant for forward reaction 4 is determined by the  $\text{p}K_a$  of  $\text{Cl}^\bullet$  ( $\text{p}K_a = 5.3$ )<sup>2</sup> and the rate constant for the reverse of reaction 4. The reverse of reaction 4 above replaces reaction 11 in Alegre et al. Reaction 7 in Alegre et al. is omitted because it is equivalent to the reverse of reaction 2 above. Reaction 14 in Alegre et al. is omitted because it is equivalent to forward reaction 2 above. Reaction 10 above is added as mentioned at the bottom right of page 3119 in Alegre et al. with its rate constant as in Buxton et al.<sup>3</sup> Reaction 11 is added to maintain pH equilibrium.

The ionic strength adjustment to the rate constant for eq 3 needs to be applied. The solutions of Alegre et al. had  $[\text{K}_2\text{S}_2\text{O}_8] = 5 \text{ mM}$  in the conventional flash and 20 mM in the laser experiments and various amounts of NaCl; the pH was 3 - 2 due to impurities in the  $\text{K}_2\text{S}_2\text{O}_8$ . At  $\mu = 0.1 \text{ M}$ ,  $k_3 = 1.5\text{E}9$ .

Note that step 8 (reaction of  $\text{SO}_4^{\bullet-}$  with  $\text{S}_2\text{O}_8^{2-}$ ) consumes a very small fraction of the  $\text{SO}_4^{\bullet-}$  at the  $\text{Cl}^-$  concentrations used. The  $\text{S}_2\text{O}_8^{\bullet-}$  produced is not consumed in the mechanism of Alegre et al.

## A comprehensive list of the 18 reported illegal loops involving HClOH•.

**Subsequent reports with illegal loops.** In addition to the publications having reversible loops involving reactions 1, 2, or 3 that violate closure (meaning that the rate constants do not agree with the requirements imposed by the loop composition), there are many publications that use reactions 1, 2, or 3 in illegal loops, which violate the principle of detailed balancing. As has been explained elsewhere, illegal loops are sets of reactions like reversible loops except where one or more of the steps are irreversible and unopposed by other irreversible steps.<sup>4</sup> Although it is often possible to rectify illegal loops by making the irreversible steps reversible with rate constants defined by the other steps, this is unlikely to be satisfactory in the present system because of the unreliability of those other rate constants.

One of the illegal loops was reported previously as illegal Loop D:<sup>5</sup>

Illegal Loop 1 (D)

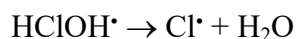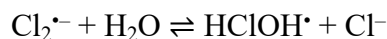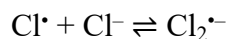

This loop is the same as the first reversible loop (eqs 1, 3, and 4 in the main text) except that its first step is irreversible. Eighteen publications were previously identified as having mechanisms that included Loop D.<sup>5</sup> Here we report an additional 38 publications that have mechanisms including Loop D.<sup>6-43</sup> In our previous report we showed that correcting Loop D by supplying the requisite value for the reverse rate constant in the first step had no effect on the simulations of the overall mechanism in one of the publications. This outcome was traced to the fact that the first step could be eliminated entirely without affecting the results of the simulation. The rate constants in Matthew and Anastasio for the steps in illegal Loop 1 require a value of  $1.5 \text{ s}^{-1}$  for the reverse rate constant of the first step.<sup>44</sup> Simulations of the loop with initial concentrations of  $0.01 \text{ M Cl}^-$  and  $1 \text{ }\mu\text{M Cl}\cdot$  yield a steady-state HClOH• concentration of  $2.6 \times 10^{-11} \text{ M}$  irrespective of whether the reverse of the first step is included or not. This result arises because the second and third steps are much faster and establish the equilibrium concentration of HClOH•, and it explains why the first step can be omitted entirely. Loop 7 below is an example of the opposite behavior, where supplying the required rate constant in an illegal loop leads to major changes in the concentrations.

Another illegal loop:

Illegal Loop 2

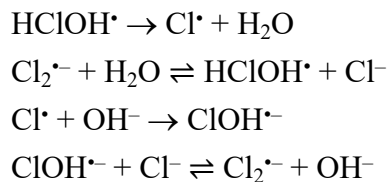

This illegal loop appears in at least 19 publications.<sup>13, 19, 24, 25, 29, 34, 38, 41, 45–55</sup>

Illegal Loop 3 differs from Loop 2 by having only the first step irreversible:

Illegal Loop 3

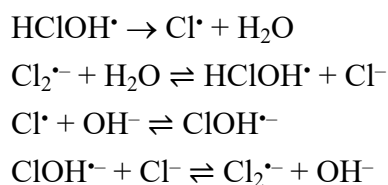

This illegal loop appears in Zhao et al. 2019,<sup>56</sup> and Zhou et al. 2019.<sup>57</sup>

Illegal loop 4 differs from Loop 2 by having only the third step irreversible:

Illegal Loop 4

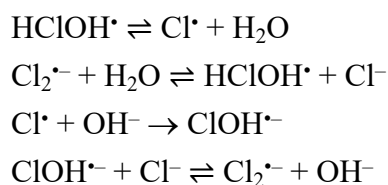

This illegal loop appears in at least 5 publications.<sup>58–62</sup>

Another illegal loop involving reactions 1, 3 and 4 has the first step in Loop 1 irreversible in the opposite direction:

Illegal Loop 5

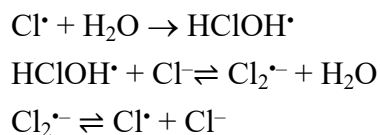

This illegal loop appears in at least three publications.<sup>63–65</sup> Martire et al. include this loop with the first step shown as reversible but with no reverse rate constant provided.<sup>66</sup>

A 6th illegal loop treats the second step as being irreversible:

#### Illegal Loop 6

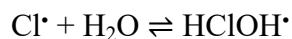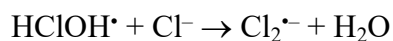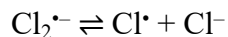

This illegal loop appears in a 2020 publication.<sup>67</sup>

There are several illegal loops in which the acid dissociation of  $\text{HClOH}^\bullet$  (eq 2, main text) is irreversible. One of these was identified in our earlier publication as Loop E:<sup>5</sup>

#### Illegal Loop 7 (E)

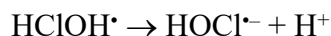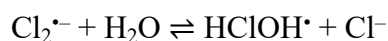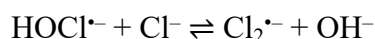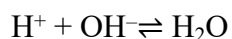

In addition to the 24 publications previously identified as having illegal Loop E, it also appears in 26 newly identified publications.<sup>7, 12, 14, 15, 17, 20–22, 27–32, 35–40, 42, 61, 62, 68–72</sup> The rate constants in Xiang et al. 2022 require a value of  $5.7 \times 10^{11} \text{ M}^{-1} \text{ s}^{-1}$  for the reverse of the first step.<sup>72</sup> Simulations of Loop 7 at pH 3 with 1 mM  $\text{Cl}^-$  and 1  $\mu\text{M}$   $\text{Cl}_2^{\bullet-}$  show that the steady-state concentration of  $\text{HClOH}^\bullet$  changes from  $9.8 \times 10^{-14} \text{ M}$  to  $2.6 \times 10^{-10} \text{ M}$  when the reverse rate constant of the first step is increased from zero to its required value. This example thus shows that correcting an illegal loop can have large consequences.

Illegal loop 8 differs from Loop 7 by having two irreversible steps:

#### Illegal Loop 8

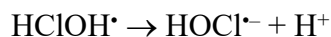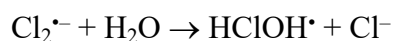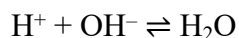

This illegal loop appears in Li et al. 2017,<sup>73</sup> Guan et al. 2018,<sup>74</sup> and Zhang et al. 2019.<sup>75</sup>

Illegal loop 9 differs from Loop 7 by having the first three steps irreversible:

#### Illegal Loop 9

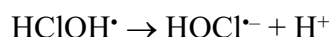

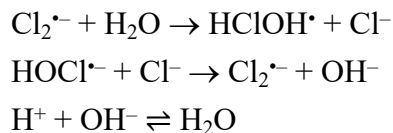

This loop appears in Wu et al. 2019,<sup>76</sup> Chow et al. 2021,<sup>77</sup> and Wu et al. 2021.<sup>78</sup>

Illegal loop 10 also differs from Loop 7 by having three irreversible steps, but in this case one of the irreversible steps is the reaction of  $\text{H}^+$  with  $\text{OH}^-$ . Mechanisms with this irreversible step are unable to simulate the pH properly.

#### Illegal Loop 10

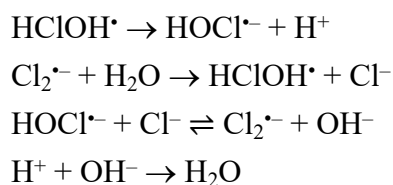

This illegal loop appears in Li et al. 2022.<sup>79</sup>

Another group of illegal loops involving the irreversible acid dissociation of  $\text{HClOH}^{\bullet}$  also includes the conversion of  $\text{HOCl}^{\bullet-}$  to  $\text{Cl}^{\bullet}$ . One of these is Loop 11:

#### Illegal Loop 11

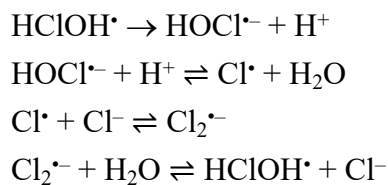

This loop appears in at least 16 publications.<sup>7, 9, 12, 13, 15, 20, 21, 24, 25, 34, 38, 41, 43, 45, 80–82</sup>

An illegal loop that differs from Loop 11 by having two irreversible steps is as follows:

#### Illegal Loop 12

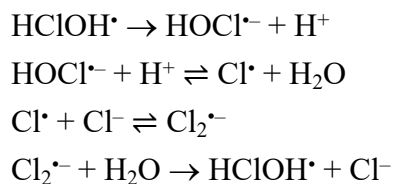

This illegal loop appears in at least 9 publications.<sup>19, 74, 75, 79, 83–87</sup>

An illegal loop that differs from Loop 11 by having three irreversible steps is as follows:

#### Illegal Loop 13

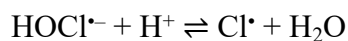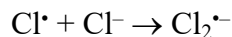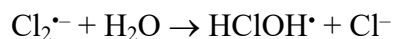

This illegal loop appears in Li et al. 2017,<sup>73</sup> and Li et al. 2020.<sup>88</sup>

An illegal loop that differs from Loop 11 in having all steps irreversible is as follows:

#### Illegal Loop 14

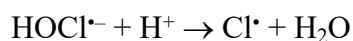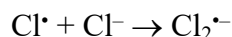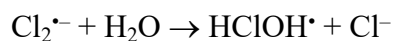

This illegal loop appears in Wu et al. 2019,<sup>76</sup> Chow et al. 2021,<sup>77</sup> and Wu et al. 2021.<sup>78</sup>

An illegal loop involving the irreversible acid dissociation of  $\text{HClOH}\cdot$  and the reversible hydration of  $\text{Cl}\cdot$  is as follows:

#### Illegal Loop 15

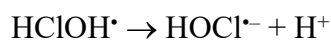

This illegal loop appears in at least 8 publications.<sup>44, 58, 61, 62, 68, 69, 89, 90</sup>

Loop 16 is the same as Loop 15 except that the last step is reversible:

#### Illegal Loop 16

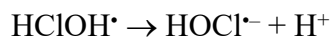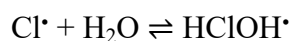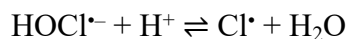

This illegal loop appears in Fu et al. 2019,<sup>59</sup> Yang et al. 2019,<sup>60</sup> Jirasek and Lukes 2020,<sup>67</sup> and Asghar et al. 2022.<sup>82</sup>

Another category of illegal loops treats the HClOH<sup>•</sup> acid dissociation as reversible where some other reaction is irreversible. Two of these are as follows:

Illegal Loop 17

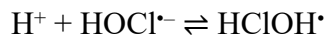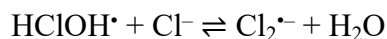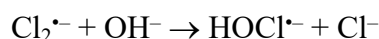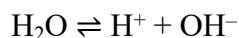

This illegal loop appears in Alegre et al. 2000,<sup>1</sup> and Szabo et al. 2016.<sup>91</sup>

Illegal Loop 18

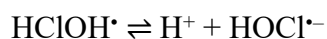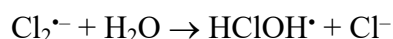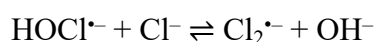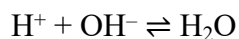

Illegal loop 18 appears in Sun et al. 2022.<sup>92</sup>

It is possible to make Loops 1, 3 – 7, 11, 16, 17 and 18 legal by supplying the requisite reverse rate constants, which can be calculated easily from the other rate constants in the loops. The results, however, are unlikely to be satisfactory given the dubious support for some of the other rate constants in the loops. Similarly, Loops 2 and 15 can be made legal by supplying the well-established rate constant for the reverse of the third step,<sup>93</sup> which would then define the reverse rate constant for the first step; the result, again, is unlikely to be satisfactory. To make Loops 8 – 10 and 12 – 14 legal would require supplying rate constants for two reactions involving HClOH<sup>•</sup>, which cannot be done reliably at this time.



## References

- 1 M. L. Alegre, M. Geronés, J. A. Rosso, S. G. Bertolotti, A. M. Braun, D. O. Mártire and M. C. Gonzalez, Kinetic Study of the Reactions of Chlorine Atoms and  $\text{Cl}_2^-$  Radical Anions in Aqueous Solutions. 1. Reaction with Benzene. *J. Phys. Chem. A*, 2000, **104**, 3117-3125.
- 2 D. A. Armstrong, R. E. Huie, W. H. Koppenol, S. V. Lymar, G. Merényi, P. Neta, B. Ruscic, D. M. Stanbury, S. Steenken and P. Wardman, Standard Electrode Potentials Involving Radicals in Aqueous Solution: Inorganic Radicals. *Pure Appl. Chem.*, 2015, **87**, 1139-1150.
- 3 G. V. Buxton, C. L. Greenstock, W. P. Helman and A. B. Ross, Critical Review of Rate Constants for Reactions of Hydrated Electrons, Hydrogen Atoms and Hydroxyl Radicals ( $\text{OH}/\text{O}^-$ ) in Aqueous Solution. *J. Phys. Chem. Ref. Data*, 1988, **17**, 513-886.
- 4 D. M. Stanbury and D. Hoffman, Systematic Application of the Principle of Detailed Balancing to Complex Homogeneous Chemical Reaction Mechanisms. *J. Phys. Chem. A*, 2019, **123**, 5436-5445.
- 5 D. M. Stanbury, Mechanisms of Advanced Oxidation Processes, the Principle of Detailed Balancing, and Specifics of the UV/Chloramine Process. *Environ. Sci. Technol.*, 2020, **54**, 4658-4663.
- 6 P. Sun, C. Tyree and C.-H. Huang, Inactivation of Escherichia coli, Bacteriophage MS2, and Bacillus Spores under UV/ $\text{H}_2\text{O}_2$  and UV/Peroxydisulfate Advanced Disinfection Conditions. *Environ. Sci. Technol.*, 2016, **50**, 4448-4458.
- 7 D. M. Bulman, S. P. Mezyk and C. K. Remucal, The Impact of pH and Irradiation Wavelength on the Production of Reactive Oxidants during Chlorine Photolysis. *Environ. Sci. Technol.*, 2019, **53**, 4450-4459.
- 8 Z. Wu, K. Guo, J. Fang, X. Yang, H. Xiao, S. Hou, X. Kong, C. Shang, X. Yang, F. Meng and L. Chen, Factors affecting the roles of reactive species in the degradation of micropollutants by the UV/chlorine process. *Water Res.*, 2017, **126**, 351-360.
- 9 K. Guo, Z. Wu, S. Yan, B. Yao, W. Song, Z. Hua, X. Zhang, X. Kong, X. Li and J. Fang, Comparison of the UV/chlorine and UV/ $\text{H}_2\text{O}_2$  processes in the degradation of PPCPs in simulated drinking water and wastewater: Kinetics, radical mechanism and energy requirements. *Water Res.*, 2018, **147**, 184-194.
- 10 K. Zhang and K. M. Parker, Halogen Radical Oxidants in Natural and Engineered Aquatic Systems. *Environ. Sci. Technol.*, 2018, **52**, 9579-9594.
- 11 Y. Komaki, A. M.-A. Simpson, J. K. Choe, M. M. Pinney, D. Herschlag, Y.-H. Chuang and W. A. Mitch, Serum electrolytes can promote hydroxyl radical-initiated biomolecular damage from inflammation. *Free Rad. Biol. Med.*, 2019, **141**, 475-472.

- 12 Y. Lei, S. Cheng, N. Luo, X. Yang and T. An, Rate Constants and Mechanisms of the Reactions of  $\text{Cl}^\bullet$  and  $\text{Cl}_2^{\bullet-}$  with Trace Organic Contaminants. *Environ. Sci. Technol.*, 2019, **53**, 11170-11182.
- 13 J. Luo, T. Liu, D. Zhang, K. Yin, D. Wang, W. Zhang, C. Liu, C. Yang, Y. Wei, L. Wang, S. Luo and J. C. Crittenden, The individual and Co-exposure degradation of benzophenone derivatives by UV/ $\text{H}_2\text{O}_2$  and UV/PDS in different water matrices. *Water Res.*, 2019, **159**, 102-110.
- 14 C. Chen, Z. Wu, S. Zheng, L. Wang, X. Niu and J. Fang, Comparative study for interactions of sulfate radical and hydroxyl radical with phenol in the presence of nitrite. *Environ. Sci. Technol.*, 2020, **54**, 8455-8463.
- 15 K. Guo, S. Zheng, X. Zhang, L. Zhao, S. Ji, C. Chen, Z. Wu, D. Wang and J. Fang, Roles of bromine radicals and hydroxyl radicals in the degradation of micropollutants by the UV/bromine process. *Environ. Sci. Technol.*, 2020, **54**, 6415-6426.
- 16 Z. Hao, J. Ma, C. Miao, Y. Song, L. Lian, S. Yan and W. Song, Carbonate Radical Oxidation of Cyindrospermopsin (Cyanotoxin): Kinetic Studies and Mechanistic Consideration. *Environ. Sci. Technol.*, 2020, **54**, 10118-10127.
- 17 T.-K. Kim, T. Kim, Y. Cha and K.-D. Zoh, Energy-efficient erythromycin degradation using UV-LED (275 nm)/chlorine process: Radical contribution, transformation products, and toxicity evaluation. *Water Res.*, 2020, **185**, 116159.
- 18 W. Lee, Y. Lee, S. Allard, J. W. Ra, S. Han and Y. Lee, Mechanistic and kinetic understanding of the UV photolysis of chlorine and bromine species in water and formation of oxyhalides. *Environ. Sci. Technol.*, 2020, **54**, 11546-11555.
- 19 M.-Y. Lee, W.-L. Wang, Y. Du, Q.-Y. Wu, N. Huang, Z.-B. Xu and H.-Y. Hu, Comparison of UV/ $\text{H}_2\text{O}_2$  and UV/PS processes for the treatment of reverse osmosis concentrate from municipal wastewater reclamation. *Chem. Eng. J.*, 2020, **388**, 124260.
- 20 Y. Lei, J. Lu, M. Zhu, J. Xie, S. Peng and C. Zhu, Radical chemistry of diethyl phthalate oxidation via UV/peroxymonosulfate process: Roles of primary and secondary radicals. *Chem. Eng. J.*, 2020, **379**, 122339.
- 21 S. Li, X. Ao, Z. Li, W. Cao, F. Wu, S. Liu and W. Sun, Insight into PPCP degradation by UV/ $\text{NH}_2\text{Cl}$  and comparison with UV/ $\text{NaClO}$ : Kinetics, reaction mechanism, and DBP formation. *Water Res.*, 2020, **182**, 115967.
- 22 Y. Pan, X. Li, K. Fu, Z. Gu, J. Shi and H. Deng, Overlooked role of secondary radicals in the degradation of beta-blockers and toxicity change in UV/chlorine process. *Chem. Eng. J.*, 2020, **391**, 123606.
- 23 W. Qin, Z. Lin, H. Dong, X. Yuan, Z. Qiang, S. Liu and D. Xia, Kinetic and mechanistic insights into the abatement of clofibric acid by integrated UV/ozone/peroxydisulfate

- process: A modeling and theoretical study. *Water Res.*, 2020, **186**, 116336.
- 24 Y. Wang, M. Couet, L. Gutierrez, S. Allard and J.-P. Croué, Impact of DOM source and character on the degradation of primidone by UV/chlorine: Reaction kinetics and disinfection by-product formation. *Water Res.*, 2020, **172**, 115463.
- 25 Y. Xie, R. Xu, R. Liu, H. Liu, J. Tian and L. Chen, Adsorbable organic halogens formed during treatment of Cl<sup>-</sup>-containing wastewater by sulfate and hydroxyl radical-based advanced oxidation processes. *Chem. Eng. J.*, 2020, **389**, 124457.
- 26 Y. Zhou, C. Chen, K. Guo, Z. Wu, L. Wang, Z. Hua and J. Fang, Kinetics and pathways of the degradation of PPCPs by carbonate radicals in advanced oxidation processes. *Water Res.*, 2020, **185**, 116231.
- 27 Z. Hua, D. Li, Z. Wu, D. Wang, Y. Cui, X. Huang, J. Fang and T. An, DBP formation and toxicity alteration during UV/chlorine treatment of wastewater and the effects of ammonia and bromide. *Water Res.*, 2021, **188**, 116549.
- 28 J. Lou, W. Wang and L. Zhu, Transformation of emerging disinfection byproducts Halobenzoquinones to haloacetic acids during chlorination of drinking water. *Chem. Eng. J.*, 2021, **418**, 129326.
- 29 T. Meng, W. Sun, X. Su and P. Sun, The optimal dose of oxidants in UV-based advanced oxidation processes with respect to primary radical concentrations. *Water Res.*, 2021, **206**, 117738.
- 30 Y. Mao, J. Liang, F. Ji, H. Dong, L. Jiang, Q. Shen and Q. Zhang, Accelerated degradation of pharmaceuticals by ferrous ion/chlorine process: Roles of Fe(IV) and reactive chlorine species. *Sci. Total Environ.*, 2021, **787**, 147584.
- 31 A. Wang, Z. Hua, C. Chen, W. Wei, B. Huang, S. Hou, X. Li and J. Fang, Radical chemistry and PPCP degradation in the UV/persulfate process in the presence of chloride at freshwater levels. *Chem. Eng. J.*, 2021, **426**, 131276.
- 32 L. Wang, C. Ye, L. Guo, C. Chen, X. Kong, Y. Chen, L. Shu, P. Wang, X. Yu and J. Fang, Assessment of the UV/Chlorine Process in the Disinfection of *Pseudomonas aeruginosa*: Efficiency and Mechanism. *Environ. Sci. Technol.*, 2021, **55**, 9221-9230.
- 33 A. Wang, Z. Hua, Z. Wu, C. Chen, S. Hou, B. Huang, Y. Wang, D. Wang, X. Li, C. Li and J. Fang, Insights into the effects of bromide at fresh water levels on the radical chemistry in the UV/peroxydisulfate process. *Water Res.*, 2021, **197**, 117042.
- 34 Y. Wang, M. Marques dos Santos, X. Ding, J. Labanowski, B. Gombert, S. A. Snyder and J.-P. Croué, Impact of EfOM in the elimination of PPCPs by UV/chlorine: Radical chemistry and toxicity bioassays. *Water Res.*, 2021, **204**, 117634.
- 35 W. Zhang, S. Zhou, Y. Wu, S. Zhu and J. Crittenden, Computerized Pathway Generator for the UV/Free Chlorine Process: Prediction of Byproducts and Reactions. *Environ. Sci.*

- Technol.*, 2021, **55**, 2608-2627.
- 36 H.-C. Zhang, Y.-L. Liu, L. Wang, Z.-Y. Li, X.-H. Lu, T. Yang and J. Ma, Enhanced Radical Generation in an Ultraviolet/Chlorine System through the Addition of TiO<sub>2</sub>. *Environ. Sci. Technol.*, 2021, **55**, 11612-11623.
- 37 Y. Zhang, B. Wang, K. Fang, Y. Qin, H. Li and J. Du, Degradation of p-aminobenzoic acid by peroxymonosulfate and evolution of effluent organic matter: The effect of chloride ion. *Chem. Eng. J.*, 2021, **411**, 128462.
- 38 S. Zhu, Z. Tian, P. Wang, W. Zhang, L. Bu, Y. Wu, B. Dong and S. Zhou, The role of carbonate radicals on the kinetics, radical chemistry, and energy requirements of UV/chlorine and UV/H<sub>2</sub>O<sub>2</sub> processes. *Chemosphere*, 2021, **278**, 130499.
- 39 J. Peng, R. Yin, X. Yang and C. Shang, A Novel UVA/ClO<sub>2</sub> Advanced Oxidation Process for the Degradation of Micropollutants in Water. *Environ. Sci. Technol.*, 2022, **56**, 1257-1266.
- 40 Z. Cao, X. Yu, Y. Zheng, E. Aghdam, B. Sun, M. Song, A. Wang, J. Han and J. Zhang, Micropollutant abatement by the UV/chloramine process in potable water reuse: A review. *J. Haz. Mater.*, 2022, **424**, 127341.
- 41 Y. Lei, X. Lei, P. Westerhoff, X. Tong, J. Ren, Y. Zhou, S. Cheng, G. Ouyang and X. Yang, Bromine Radical (Br<sup>•</sup> and Br<sub>2</sub><sup>•-</sup>) Reactivity with Dissolved Organic Matter and Brominated Organic Byproduct Formation. *Environ. Sci. Technol.*, 2022, **56**, 5189-5199.
- 42 Y. Mao, J. Liang, L. Jiang, Q. Shen, Q. Zhang, C. Liu and F. Ji, A comparative study of free chlorine and peroxymonosulfate activated by Fe(II) in the degradation of iopamidol: Mechanisms, density functional theory (DFT) calculations and formation of iodinated disinfection by-products. *Chem. Eng. J.*, 2022, **435**, 134753.
- 43 T. Zhu, J. Deng, S. Zhu, A. Cai, C. Ye, X. Ling, H. Guo, Q. Wang and X. Li, Kinetic and mechanism insights into the degradation of venlafaxine by UV/chlorine process: A modelling study. *Chem. Eng. J.*, 2022, **431**, 133473.
- 44 B. M. Matthew and C. Anastasio, A chemical probe technique for the determination of reactive halogen species in aqueous solution: Part 1 - bromide solutions. *Atmos. Chem. Phys.*, 2006, **6**, 2423-2437.
- 45 Y. Yang, J. J. Pignatello, J. Ma and W. A. Mitch, Comparison of Halide Impacts on the Efficiency of Contaminant Degradation by Sulfate and Hydroxyl Radical-Based Advanced Oxidation Processes (AOPs). *Environ. Sci. Technol.*, 2014, **48**, 2344-2351.
- 46 R. Zhang, P. Sun, T. H. Boyer, L. Zhao and C.-H. Huang, Degradation of Pharmaceuticals and Metabolite in Synthetic Human Urine by UV, UV/H<sub>2</sub>O<sub>2</sub>, and UV/PDS. *Environ. Sci. Technol.*, 2015, **49**, 3056-3066.
- 47 P. Sun, W.-N. Lee, R. Zhang and C.-H. Huang, Degradation of DEET and Caffeine under

- UV/Chlorine and Simulated Sunlight/Chlorine Conditions. *Environ. Sci. Technol.*, 2016, **50**, 13265-13273.
- 48 Y. Yang, J. J. Pignatello, J. Ma and W. A. Mitch, Effect of matrix components on UV/H<sub>2</sub>O<sub>2</sub> and UV/S<sub>2</sub>O<sub>8</sub><sup>2-</sup> advanced oxidation processes for trace organic degradation in reverse osmosis brines from municipal wastewater reuse facilities. *Water Res.*, 2016, **89**, 192-200.
- 49 L. Lian, B. Yao, S. Hou, J. Fang, S. Yan and W. Song, Kinetic Study of Hydroxyl and Sulfate Radical-Mediated Oxidation of Pharmaceuticals in Wastewater Effluents. *Environ. Sci. Technol.*, 2017, **51**, 2954-2962.
- 50 Y. Yang and J. J. Pignatello, Participation of the Halogens in Photochemical Reactions in Natural and Treated Waters. *Molecules*, 2017, **22**, 1684.
- 51 W. Li, S. Patton, J. M. Gleason, S. P. Mezyk, K. P. Ishida and H. Liu, UV Photolysis of Chloramine and Persulfate for 1,4-Dioxane Removal in Reverse-Osmosis Permeate for Potable Water Reuse. *Environ. Sci. Technol.*, 2018, **52**, 6417-6425.
- 52 R. Zhang, T. Meng, C.-H. Huang, W. Ben, H. Yao, R. Liu and P. Sun, PPCP Degradation by Chlorine-UV Processes in Ammoniacal Water: New Reaction Insights, Kinetic Modeling, and DBP Formation. *Environ. Sci. Technol.*, 2018, **52**, 7833-7841.
- 53 P. Sun, T. Meng, Z. Wang, R. Zhang, H. Yao, Y. Yang and L. Zhao, Degradation of Organic Micropollutants in UV/NH<sub>2</sub>Cl Advanced Oxidation Process. *Environ. Sci. Technol.*, 2019, **53**, 9024-9033.
- 54 Z. Wu, Chen, C, B.-Z. Zhu, C.-H. Huang, T. An, F. Meng and J. Fang, Reactive Nitrogen Species Are Also Involved in the Transformation of Micropollutants by the UV/Monochloramine Process. *Environ. Sci. Technol.*, 2019, **53**, 11142-11152.
- 55 Y. Yang, Y. Cao, J. Jiang, X. Lu, J. Ma, S. Pang, J. Li, Y. Liu, Y. Zhou and C. Guan, Comparative study on degradation of propranolol and formation of oxidation products by UV/H<sub>2</sub>O<sub>2</sub> and UV/persulfate (PDS). *Water Res.*, 2019, **149**, 543-552.
- 56 X. Zhao, J. Jiang, S. Pang, C. Guan, J. Li, Z. Wang, J. Ma and C. Luo, Degradation of iopamidol by three UV-based oxidation processes: Kinetics, pathways, and formation of iodinated disinfection byproducts. *Chemosphere*, 2019, **221**, 270-277.
- 57 S. Zhou, W. Zhang, J. Sun, S. Zhu, K. Li, X. Meng, J. Luo, Z. Shi, D. Zhou and J. C. Crittenden, Oxidation Mechanisms of the UV/Free Chlorine Process: Kinetic Modeling and Quantitative Structure Activity Relationships. *Environ. Sci. Technol.*, 2019, **53**, 4335-4345.
- 58 S. Cheng, X. Zhang, X. Yang, C. Shang, W. Song, J. Fang and Y. Pan, The Multiple Role of Bromide ion in PPCPs degradation under UV/Chlorine Treatment. *Environ. Sci. Technol.*, 2018, **52**, 1806-1816.
- 59 Y. Fu, G. Wu, J. Geng, J. Li, S. Li and H. Ren, Kinetics and modeling of artificial sweeteners degradation in wastewater by the UV/persulfate process. *Water Res.*, 2019, **150**,

- 12-20.
- 60 F. Yang, B. Sheng, Z. Wang, R. Yuan, Y. Xue, X. Wang, Q. Liu and J. Liu, An often-overestimated adverse effect of halides in heat/persulfate-based degradation of wastewater contaminants. *Environ. Int.*, 2019, **130**, 104918.
- 61 M. Li, Q. Mei, D. Han, B. Wei, Z. An, H. Cao, J. Xie and M. He, The roles of HO<sup>•</sup>, ClO<sup>•</sup> and BrO<sup>•</sup> radicals in caffeine degradation: A theoretical study. *Sci. Total Environ.*, 2021, **768**, 144733.
- 62 K. Yin, T. Li, T. Zhang, Y. Zhang, C. Yang and S. Luo, Degradation of organic filter 2-Phenylbenzimidazole-5-Sulfonic acid by light-driven free chlorine process: Reactive species and mechanisms. *Chem. Eng. J.*, 2022, **430**, 132684.
- 63 D. Minakata, D. Kamath and S. Maetzold, Mechanistic Insight into the Reactivity of Chlorine-Derived Radicals in the Aqueous-Phase UV-Chlorine Advanced Oxidation Process: Quantum Mechanical Calculations. *Environ. Sci. Technol.*, 2017, **51**, 6918-1926.
- 64 J. De Laat and M. I. Stefan. "UV/Chlorine process" in *Advanced Oxidation Processes for Water Treatment*; Stefan, M. I., Ed.; IWA Publishing, London, **2018**; 383-428.
- 65 D. Kamath and D. Minakata, Emerging investigators series: ultraviolet and free chlorine aqueous-phase advanced oxidation process: kinetic simulations and experimental validation. *Environ. Sci.: Water Res. Technol.*, 2018, **4**, 1251-1258.
- 66 D. O. Mártire, J. A. Rosso, S. Bertolotti, G. Carrillo Le Roux, A. M. Braun and M. C. Gonzalez, Kinetic Study of the Reactions of Chlorine Atoms and Cl<sub>2</sub><sup>-</sup> Radical Anions in Aqueous Solutions. II. Toluene, Benzoic Acid, and Chlorobenzene. *J. Phys. Chem. A*, 2001, **105**, 5385-5392.
- 67 V. Jirasek and P. Lukes, Competitive reactions in Cl<sup>-</sup> solutions treated by plasma-supplied O atoms. *J. Phys. D: Appl. Phys.*, 2020, **53**, 505206.
- 68 A. N. Pham, G. Xing, C. J. Miller and D. Waite, Fenton-like copper redox chemistry revisited: Hydrogen peroxide and superoxide mediation of copper-catalyzed oxidant production. *J. Catal.*, 2013, **301**, 54-64.
- 69 G. Xing, A. N. Pham, C. J. Miller and T. D. Waite, pH-dependence of production of oxidants (Cu(III) and/or HO<sup>•</sup>) by copper-catalyzed decomposition of hydrogen peroxide under conditions typical of natural saline waters. *Geochim. Cosmochim. Acta*, 2018, **232**, 30-47.
- 70 Z. Wang, Q. Liu, F. Yang, Y. Huang, Y. Xue, R. Yuan, B. Sheng and X. Wang, Accelerated oxidation of 2,4,6-trichlorophenol in Cu(II)/H<sub>2</sub>O<sub>2</sub>/Cl<sup>-</sup> system: A unique "halotolerant" Fenton-like process? *Environ. Int.*, 2019, **132**, 105128.
- 71 X. Zhang, K. Guo, Y. Wang, Q. Qin, Z. Yuan, J. He, C. Chen, Z. Wu and J. Fang, Roles of bromine radicals, HOBr and Br<sub>2</sub> in the transformation of flumequine by the UV/chlorine

- process in the presence of bromide. *Chem. Eng. J.*, 2020, **400**, 12522.
- 72 H. Xiang, N. Gao, X. Lu, Y. Xiang and W. Chu, Degradation of sulfamethazine in UV/monochloramine process: Kinetics, by-products formation, and toxicity evaluation. *Chem. Eng. J.*, 2022, **430**, 133008.
- 73 W. Li, R. Orozco, N. Camargos and H. Liu, Mechanisms on the Impacts of Alkalinity, pH, and Chloride on Persulfate-Based Groundwater Remediation. *Environ. Sci. Technol.*, 2017, **51**, 3948-3959.
- 74 Y.-H. Guan, J. Ma, D.-K. Liu, Z.-f. Ou, W. Zhang, X.-L. Gong, Q. Fu and J. C. Crittenden, Insight into chloride effect on the UV/peroxymonosulfate process. *Chem. Eng. J.*, 2018, **352**, 477-489.
- 75 Z. Zhang, Y. H. Chuang, N. Huang and W. A. Mitch, Predicting the Contribution of Chloramines to Contaminant Decay during Ultraviolet/Hydrogen Peroxide Advanced Oxidation Process Treatment for Potable Reuse. *Environ. Sci. Technol.*, 2019, **53**, 4416-4425.
- 76 Y. Wu, S. Zhu, W. Zhang, L. Bu and S. Zhou, Comparison of diatrizoate degradation by UV/chlorine and UV/chloramine processes: Kinetic mechanisms and iodinated disinfection byproducts formation. *Chem. Eng. J.*, 2019, **375**, 121972.
- 77 C.-H. Chow, J. C.-F. Law and K. S.-Y. Leung, Degradation of acesulfame in UV/monochloramine process: Kinetics, transformation pathways and toxicity assessment. *J. Haz. Mater.*, 2021, **403**, 123935.
- 78 Y. Wu, S. Zhu, J. Wang, L. Bu, J. Deng and S. Zhou, Role of reactive nitrogen species in ranitidine degradation in UV/chloramine process: Transformation pathways and NDMA formation. *Chem. Eng. J.*, 2021, **404**, 126557.
- 79 G.-Q. Li, Z.-Y. Huo, Q.-Y. Wu, Z. Chen, Y.-H. Wu, Y. Lu and H. Y. Hu, Photolysis of free chlorine and production of reactive radicals in the UV/chlorine system using polychromatic LEDs as UV sources. *Chemosphere*, 2022, **286**, 131828.
- 80 W. Li, T. Jain, K. Ishida and H. Liu, A mechanistic understanding of the degradation of trace organic contaminants by UV/hydrogen peroxide, UV/persulfate and UV/free chlorine for water reuse. *Environ Sci.: Water Res.*, 2017, **3**, 128-138.
- 81 K. Guo, Z. Wu, C. Shang, B. Yao, S. Hou, X. Yang, W. Song and J. Fang, Radical Chemistry and Structural relationships of PPCP Degradation by UV/Chlorine Treatment in Simulated Drinking Water. *Environ. Sci. Technol.*, 2017, **51**, 10431-10439.
- 82 A. Asghar, H. V. Lutze, J. Tuerk and T. C. Schmidt, Influence of water matrix on the degradation of organic micropollutants by ozone based processes: A review on oxidant scavenging mechanism. *J. Haz. Mater.*, 2022, **429**, 128189.
- 83 Y.-H. Chuang, K. M. Parker and W. A. Mitch, Development of Predictive Models for the

- Degradation of Halogenated Disinfection Byproducts during the UV/H<sub>2</sub>O<sub>2</sub> Advanced Oxidation Process. *Environ. Sci. Technol.*, 2016, **50**, 11209-11217.
- 84 Y.-H. Chuang, S. Chen, C. J. Chinn and W. A. Mitch, Comparing the UV-Monochloramine and UV/Free Chlorine Advanced Oxidation Processes (AOPs) to the UV/Hydrogen Peroxide AOP Under Scenarios Relevant to Potable Reuse. *Environ. Sci. Technol.*, 2017, **51**, 13859-13868.
- 85 Z. Zhang, Y.-H. Chuang, A. Szczuka, K. P. Ishida, S. Roback, M. H. Plumlee and W. A. Mitch, Pilot-scale evaluation of oxidant speciation, 1,4-dioxane degradation and disinfection byproduct formation during UV/hydrogen peroxide, UV/free chlorine and UV/chloramines advanced oxidation process treatment for potable reuse. *Water Res.*, 2019, **164**, 114939.
- 86 X. Zhang, J. He, Y. Lei, Z. Qiu, S. Cheng and X. Yang, Combining solar irradiation with chlorination enhances the photochemical decomposition of microcystin-LR. *Water Res.*, 2019, **159**, 324-332.
- 87 X. Kong, L. Wang, F. Wu, H. Sun, K. Guo, Z. Hua and J. Fang, Solar irradiation combined with chlorine can detoxify herbicides. *Water Res.*, 2020, **177**, 115784.
- 88 B. Li, X. Ma, J. Deng, Q. Li, W. Chen, G. Li, G. Chen and J. Wang, Comparison of acetaminophen degradation in UV-LED-based advanced oxidation processes: Reaction kinetics, radicals contribution, degradation pathways and acute toxicity assessment. *Sci. Total Envir.*, 2020, **723**, 137993.
- 89 J. E. Grebel, J. J. Pignatello, W. Song, W. J. Cooper and W. A. Mitch, Impact of halides on the photobleaching of dissolved organic matter. *Marine Chem.*, 2009, **115**, 134-144.
- 90 J. E. Grebel, J. J. Pignatello and W. A. Mitch, Effect of Halide Ions and Carbonates on Organic Contaminant Degradation by Hydroxyl Radical-Based Advanced Oxidation Processes in Saline Waters. *Environ. Sci. Technol.*, 2010, **44**, 6822-6828.
- 91 L. Szabo, T. Toth, E. Takacs and L. Wojnarovits, One-electron oxidation of molecules with aromatic and thioether functions: Cl<sub>2</sub><sup>-</sup>/Br<sub>2</sub><sup>-</sup> and <sup>•</sup>OH induced oxidation of penicillins studied by pulse radiolysis. *J. Photochem. Photobiol. A: Chem.*, 2016, **326**, 50-59.
- 92 B. Sun, Y. Zheng, C. Shang and R. Yin, Concentration-dependent chloride effect on radical distribution and micropollutant degradation in the sulfate radical-based AOPs. *J. Haz. Mater.*, 2022, **430**, 128450.
- 93 X.-Y. Yu, Critical Evaluation of Rate Constants and Equilibrium Constants of Hydrogen Peroxide Photolysis in Acidic Aqueous Solutions Containing Chloride Ions. *J. Phys. Chem. Ref. Data*, 2004, **33**, 747-763.
